# Supplementary material
Source: MDPI journal article supplement (https://www.mdpi.com/2673-5636/3/4/37)

## Supporting information

**Figure S1.** Design of the old (A) and new (B) enclosures. The design of the old enclosure is reproduced from Freeland *et al* [18]. The positions of the camera traps are indicated by the red camera icons.

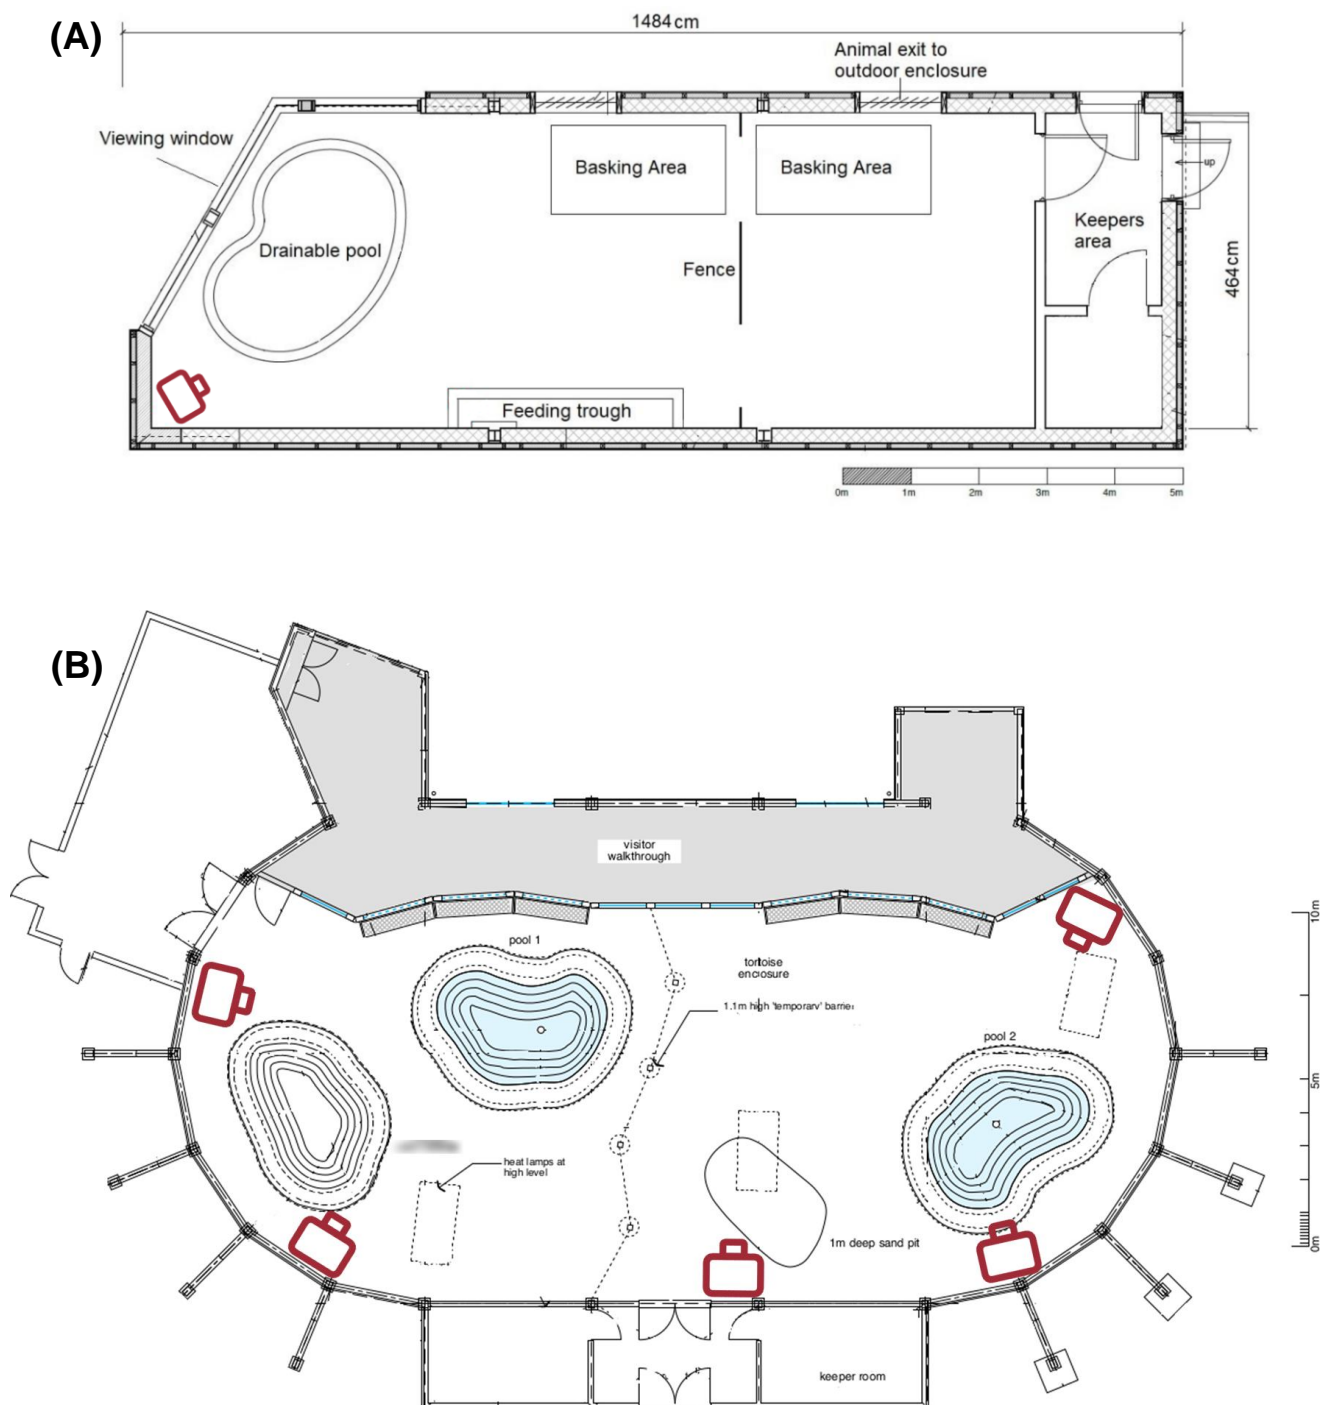

Supplement: s1 [file s1 › jzbg-1889210-supplementary.pdf]
